# Supplementary material for: Avian Group D Rotaviruses: Structure, Epidemiology, Diagnosis, and Perspectives on Future Research Challenges
Source: PubMed Central journal article supplement (PMC5750577; doi:10.3390/pathogens6040053), 2017-10-24
Supplement: pathogens-06-00053-s001.pdf [file pathogens-06-00053-s001.pdf]

Supplementary Table S1. The gene-wise (partial/complete) accession number details of avian rotavirus D.

VP1 gene

| Accession<br>no | Complete/<br>Partial |
|-----------------|----------------------|
| NC014511        | Complete             |
| KM254191        | Partial              |
| KM254202        | Partial              |
| KY069074        | Partial              |
| KY069075        | Partial              |

VP2 gene

| Accession<br>no | Complete/<br>Partial |
|-----------------|----------------------|
| NC014512        | Complete             |
| KM254203        | Partial              |
| KM254192        | Partial              |
| KY069078        | Partial              |
| KY069077        | Partial              |
| KY069076        | Partial              |

VP3 gene

| Accession<br>no | Complete/<br>Partial |
|-----------------|----------------------|
| NC014514        | Complete             |
| KF142491        | Complete             |
| KM254204        | Partial              |
| KM254193        | Partial              |

|          |         |
|----------|---------|
| KY069081 | Partial |
| KY069080 | Partial |
| KY069079 | Partial |
| KY069082 | Partial |

VP4 gene

| Accession<br>no | Complete/<br>Partial |
|-----------------|----------------------|
| NC_014513       | Complete             |
| KM254205        | Partial              |
| KM254194        | Partial              |
| KY069086        | Partial              |
| KY069084        | Partial              |
| KY069085        | Partial              |
| KY069083        | Partial              |

VP6 gene

| Accession<br>no | Complete/<br>Partial |
|-----------------|----------------------|
| NC_014516       | Complete             |
| ,KX374470       | Complete             |
| JX187435        | Complete             |
| JQ065736        | Partial              |
| JQ065735        | Partial              |
| JQ065734        | Partial              |
| KC623166        | Partial              |
| KC623165        | Partial              |
| KC623164        | Partial              |
| KX907137        | Partial              |

|          |         |
|----------|---------|
| KM254206 | Partial |
| KM254195 | Partial |
| KJ101589 | Partial |
| KJ101588 | Partial |
| KJ101587 | Partial |
| KJ101586 | Partial |
| KJ101585 | Partial |
| KJ101584 | Partial |
| KJ101583 | Partial |
| KJ101582 | Partial |
| KJ101581 | Partial |
| KJ101580 | Partial |
| KJ101579 | Partial |
| KY069087 | Partial |
| JX187434 | Partial |
| JN703463 | Partial |
| KC689309 | Partial |
| KC689308 | Partial |
| KC689307 | Partial |
| KC689306 | Partial |
| HM060261 | Partial |
| HM060260 | Partial |
| KP975938 | Partial |
| KP975937 | Partial |
| KP975936 | Partial |

KP975935 Partial  
KP975934 Partial  
KP975933 Partial  
KT073227 Partial

VP7 gene

| Accession<br>no | Complete/<br>Partial |
|-----------------|----------------------|
| NC_014519       | Complete             |
| KF142489        | Complete             |
| KM254196        | Complete             |
| KM254207        | Partial              |
| KJ101578        | Partial              |
| KJ101577        | Partial              |
| KJ101576        | Partial              |
| KJ101575        | Partial              |
| KJ101574        | Partial              |
| KJ101573        | Partial              |
| KJ101572        | Partial              |
| KJ101571        | Partial              |
| KJ101570        | Partial              |
| KJ101569        | Partial              |
| KJ101568        | Partial              |
| KY069089        | Partial              |
| KY069088        | Partial              |
| KC669414        | Partial              |
| KC669413        | Partial              |

|          |         |
|----------|---------|
| KC669412 | Partial |
| KC669411 | Partial |
| KC669410 | Partial |
| KC669409 | Partial |
| KC669408 | Partial |

NSP1

| Accession<br>no | Complete/<br>Partial |
|-----------------|----------------------|
| NC_014515       | Complete             |
| KM254208        | Partial              |
| KM254197        | Partial              |
| KY069070        | Partial              |
| KY069069        | Partial              |
| KY069068        | Partial              |

NSP2

| Accession<br>no | Complete/<br>Partial |
|-----------------|----------------------|
| NC_014518       | Complete             |
| KM254209        | Partial              |
| KM254198        | Partial              |
| KY069071        | Partial              |

NSP3

| Accession<br>no | Complete/<br>Partial |
|-----------------|----------------------|
| NC_014517       | Complete             |
| KM254210        | Partial              |

KM254199 Partial

KY069072 Partial

NSP4

| Accession<br>no | Complete/<br>Partial |
|-----------------|----------------------|
| NC_014520       | Complete             |
| KF142490        | Complete             |
| KX374472        | Complete             |
| KX374471        | Complete             |
| KM254211        | Partial              |
| KM254200        | Partial              |
| KY069073        | Partial              |

NSP5

| Accession<br>no | Complete/<br>Partial |
|-----------------|----------------------|
| NC_014521       | Complete             |
| KM254201        | Partial              |
